# Supplementary material for: Unraveling the Molecular Cross-talk in the Comorbidity of Multiple Myeloma and Systemic Light-Chain Amyloidosis through Multi-Dataset Analysis
Source: Research Square preprint supplement (doi:10.21203/rs.3.rs-7555168/v1), 2025-11-06
Supplement: Supplementary file 1 [file ffcdfe890f3e28f221a29729.docx]

# **Supplementary Table 1.** Summary of the data sets utilized in this research and their features.

| **Dataset** | **Platform** | **Disease** | **Sample** |
| --- | --- | --- | --- |
| GSE6477 | GPL96 | MM | 125 cases of MM and 15 controls |
| GSE16558 | GPL6244 | MM | 60 cases of MM and 5 controls |
| GSE175384 | GPL18573 | AL | 32 cases of AL and 40 controls |
| GSE4581 | GPL570 | MM | 414 cases of MM (414 with survival data) |
| GSE73040 | GPL6244 | AL | 9 cases of AL and 5 controls |
| MMRF | TCGA | MM | 764 primary MM samples (763 with survival data) |
| GSE188222 | GPL24676 | AL | 3 cases of AL and 1 control |
| GSE271107 | GPL24676 | MM | 4 cases of MM and 5 controls |

# Notes: MM: Multiple myeloma; AL: Immunoglobulin light-chain amyloidosis; GEO: Gene Expression Omnibus; TCGA: The Cancer Genome Atlas.

# **Supplementary Table 2.** GO Pathway Enrichment Analysis Results.

| **ONTOLOGY** | **ID** | **Description** | **BgRatio** | ***P* value** |
| --- | --- | --- | --- | --- |
| GO/BP | GO:0030098 | lymphocyte differentiation | 422/18614 | 0.001 |
| GO/BP | GO:1903131 | mononuclear cell differentiation | 474/18614 | 0.001 |
| GO/BP | GO:0050804 | modulation of chemical synaptic transmission | 487/18614 | 0.002 |
| GO/BP | GO:0099177 | regulation of trans-synaptic signaling | 488/18614 | 0.002 |
| GO/BP | GO:0034976 | response to endoplasmic reticulum stress | 259/18614 | 0.001 |
| GO/CC | GO:0098978 | glutamatergic synapse | 410/19518 | 0.001 |
| GO/CC | GO:0032279 | asymmetric synapse | 353/19518 | 0.004 |
| GO/CC | GO:0098984 | neuron to neuron synapse | 382/19518 | 0.005 |
| GO/CC | GO:0097060 | synaptic membrane | 390/19518 | 0.005 |
| GO/CC | GO:0009897 | external side of plasma membrane | 426/19518 | 0.007 |
| GO/MF | GO:0008083 | growth factor activity | 116/8859 | 0.028 |
| GO/MF | GO:1901681 | sulfur compound binding | 133/8859 | 0.036 |
| GO/MF | GO:0046982 | protein heterodimerization activity | 138/8859 | 0.038 |
| GO/MF | GO:0001618 | virus receptor activity | 19/8859 | 0.287 |
| GO/MF | GO:0140272 | exogenous protein binding | 21/8859 | 0.287 |

# Notes: GO: Gene Ontology; BP: Biological Process; CC: Cellular Component; MF: Molecular Function.

# **Supplementary Table 3.** KEGG Pathway Enrichment Analysis Results.

| **Function** | **ID** | **Description** | **BgRatio** | ***P* value** |
| --- | --- | --- | --- | --- |
| KEGG | hsa04514 | Cell adhesion molecules | 158/8859 | 0.005 |
| KEGG | hsa04530 | Tight junction | 170/8859 | 0.006 |
| KEGG | hsa04510 | Focal adhesion | 203/8859 | 0.010 |
| KEGG | hsa05205 | Proteoglycans in cancer | 204/8859 | 0.010 |
| KEGG | hsa05218 | Melanoma | 73/8859 | 0.011 |
| KEGG | hsa05223 | Non-small cell lung cancer | 73/8859 | 0.011 |
| KEGG | hsa05100 | Bacterial invasion of epithelial cells | 78/8859 | 0.013 |
| KEGG | hsa01521 | EGFR tyrosine kinase inhibitor resistance | 80/8859 | 0.013 |
| KEGG | hsa05222 | Small cell lung cancer | 93/8859 | 0.018 |
| KEGG | hsa03265 | Virion -Ebolavirus, Lyssavirus and Morbillivirus | 12/8859 | 0.026 |
| KEGG | hsa04724 | Glutamatergic synapse | 116/8859 | 0.028 |
| KEGG | hsa04068 | FoxO signaling pathway | 133/8859 | 0.036 |
| KEGG | hsa05135 | Yersinia infection | 138/8859 | 0.038 |
| KEGG | hsa00531 | Glycosaminoglycan degradation | 19/8859 | 0.287 |
| KEGG | hsa05226 | Gastric cancer | 150/8859 | 0.287 |
| KEGG | hsa04151 | PI3K-Akt signaling pathway | 362/8859 | 0.287 |
| KEGG | hsa00532 | Glycosaminoglycan biosynthesis - chondroitin sulfate / dermatan sulfate | 21/8859 | 0.287 |

Notes: KEGG: Kyoto Encyclopedia of Genes and Genomes.

# **Supplementary Table 4.** Univariate Cox regression analysis of 23 genes.

| **Gene** | **HR** | **HR.95L** | **HR.95H** | ***P* value** |
| --- | --- | --- | --- | --- |
| HOMER3 | 1.20 | 1.08 | 1.34 | 0.00 |
| OPN3 | 1.84 | 1.53 | 2.20 | 0.00 |
| CLEC2D | 1.28 | 1.13 | 1.45 | 0.00 |
| DNAJC3 | 1.29 | 1.09 | 1.53 | 0.00 |
| ERF | 1.38 | 1.18 | 1.62 | 0.00 |
| PLA2G2D | 0.87 | 0.76 | 1.00 | 0.05 |
| PRR7 | 1.35 | 1.16 | 1.56 | 0.00 |
| RCBTB2 | 0.86 | 0.77 | 0.96 | 0.01 |
| ARPC5L | 1.47 | 1.25 | 1.74 | 0.00 |
| USO1 | 1.35 | 1.10 | 1.66 | 0.00 |
| EIF4EBP2 | 1.77 | 1.46 | 2.14 | 0.00 |
| GRIK4 | 0.86 | 0.77 | 0.96 | 0.01 |
| ITGB1 | 1.23 | 1.10 | 1.37 | 0.00 |
| AZIN1 | 1.81 | 1.50 | 2.18 | 0.00 |
| CBS | 1.24 | 1.08 | 1.42 | 0.00 |
| NFIL3 | 1.50 | 1.33 | 1.69 | 0.00 |
| CSGALNACT2 | 1.37 | 1.16 | 1.61 | 0.00 |
| THOP1 | 2.01 | 1.69 | 2.41 | 0.00 |
| TMEM259 | 1.28 | 1.07 | 1.54 | 0.01 |
| PTP4A3 | 1.10 | 1.04 | 1.16 | 0.00 |
| LSAMP | 0.83 | 0.76 | 0.90 | 0.00 |
| SELL | 1.11 | 1.05 | 1.18 | 0.00 |
| P2RY11 | 1.53 | 1.28 | 1.82 | 0.00 |

# **Supplementary Table 5.** Gene Coefficients from LASSO Regression Analysis.

| **Gene** | **Coef** |
| --- | --- |
| HOMER3 | 0.059 |
| OPN3 | 0.184 |
| CLEC2D | 0.119 |
| PLA2G2D | -0.040 |
| PRR7 | 0.020 |
| RCBTB2 | -0.126 |
| EIF4EBP2 | 0.059 |
| AZIN1 | 0.052 |
| NFIL3 | 0.076 |
| THOP1 | 0.403 |
| PTP4A3 | 0.051 |
| LSAMP | -0.157 |

Notes: Coef: Coefficient.


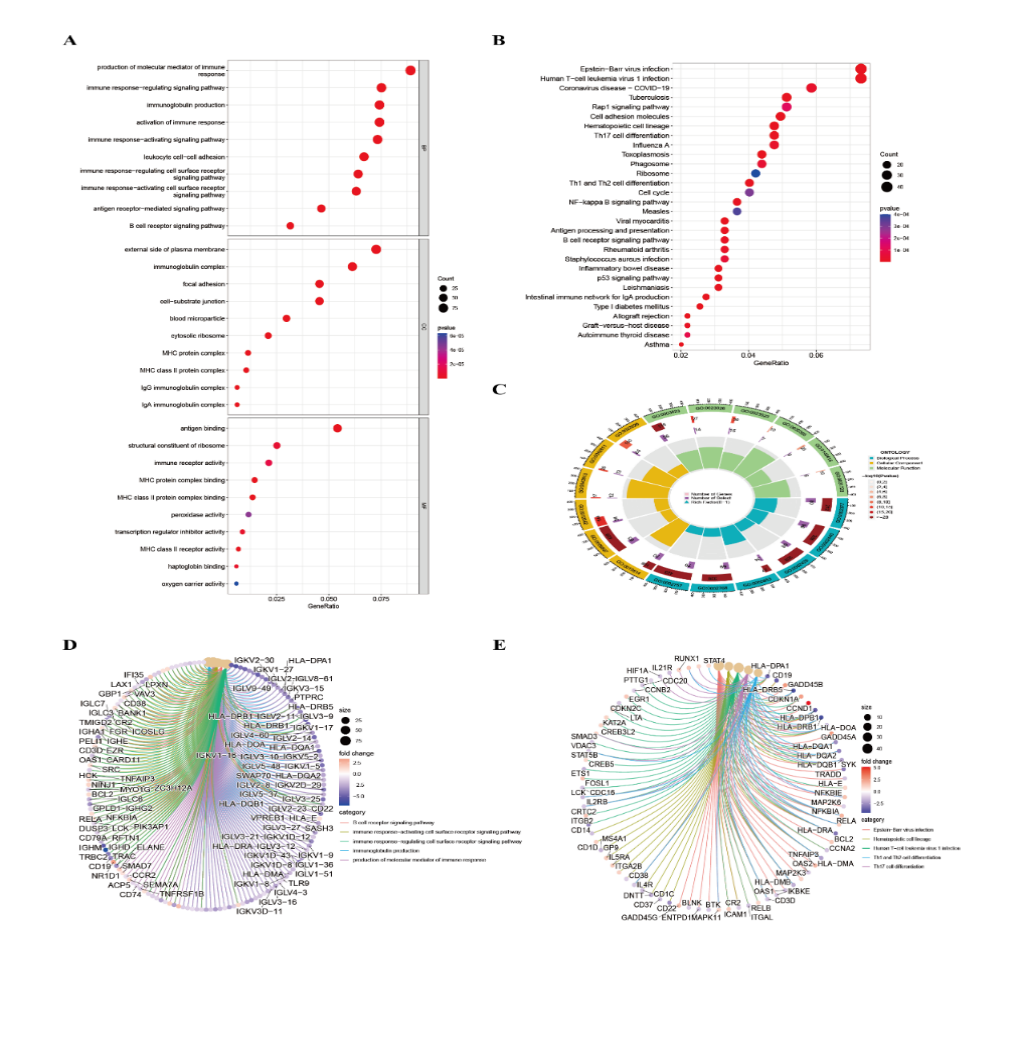


# **Supplementary Figure S1.** Functional analysis for DEGs.(A) Analysis of the DEGs using GO. (B) An analysis of DEGs using KEGG. (C) Gene-Biological Process Association Network. (D) The circle chart shows the genes enriched in different GO terms. (E) The circle chart shows the genes enriched in different KEGG terms.


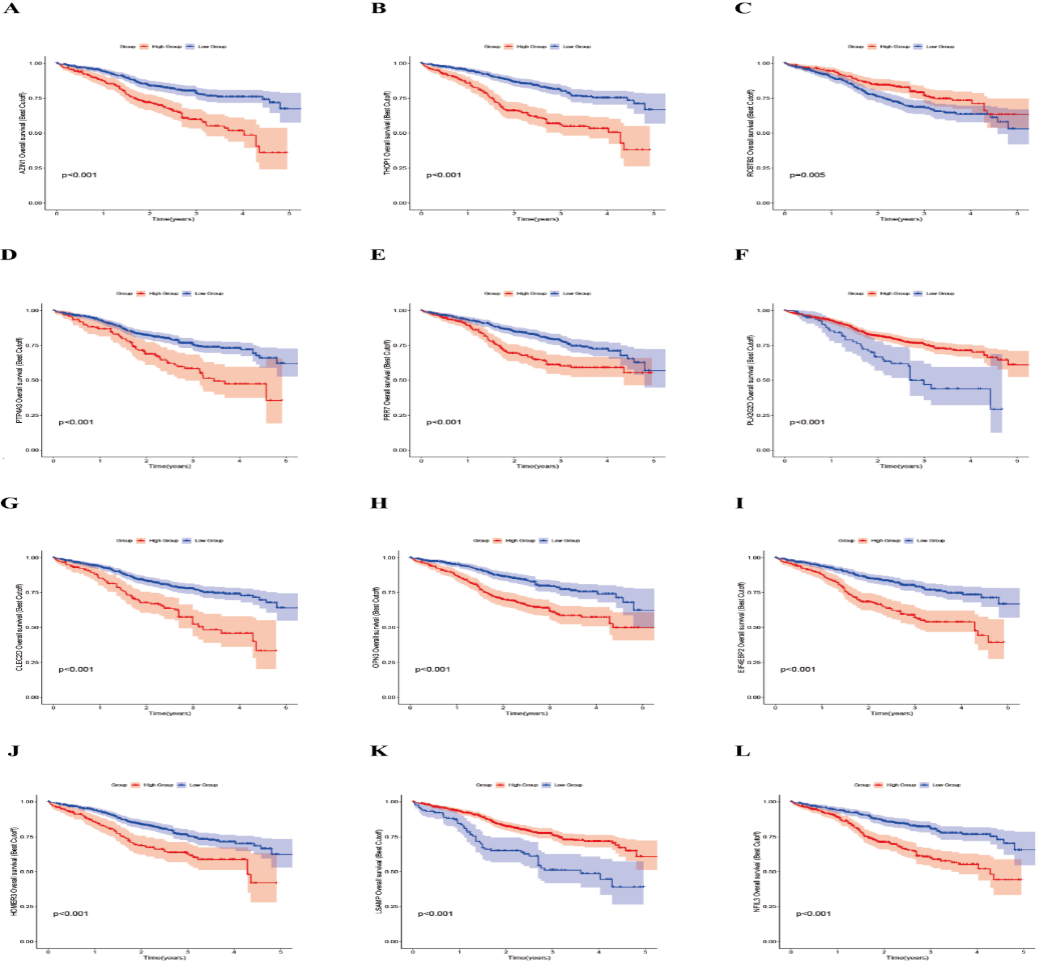


**Supplementary Figure S2.** Prognostic genes KM curve. (A)AZIN1;(B) THOP1;(C) RCBTB2;(D) PTP4A3;(D) PTP4A3;(E) PRR7;(F) PLA2G2D;(G) CLEC2D;(H) OPN3;(I) EIF4EBP2;(J) HOMER3;(K) LSAMP;(L) NFIL3.


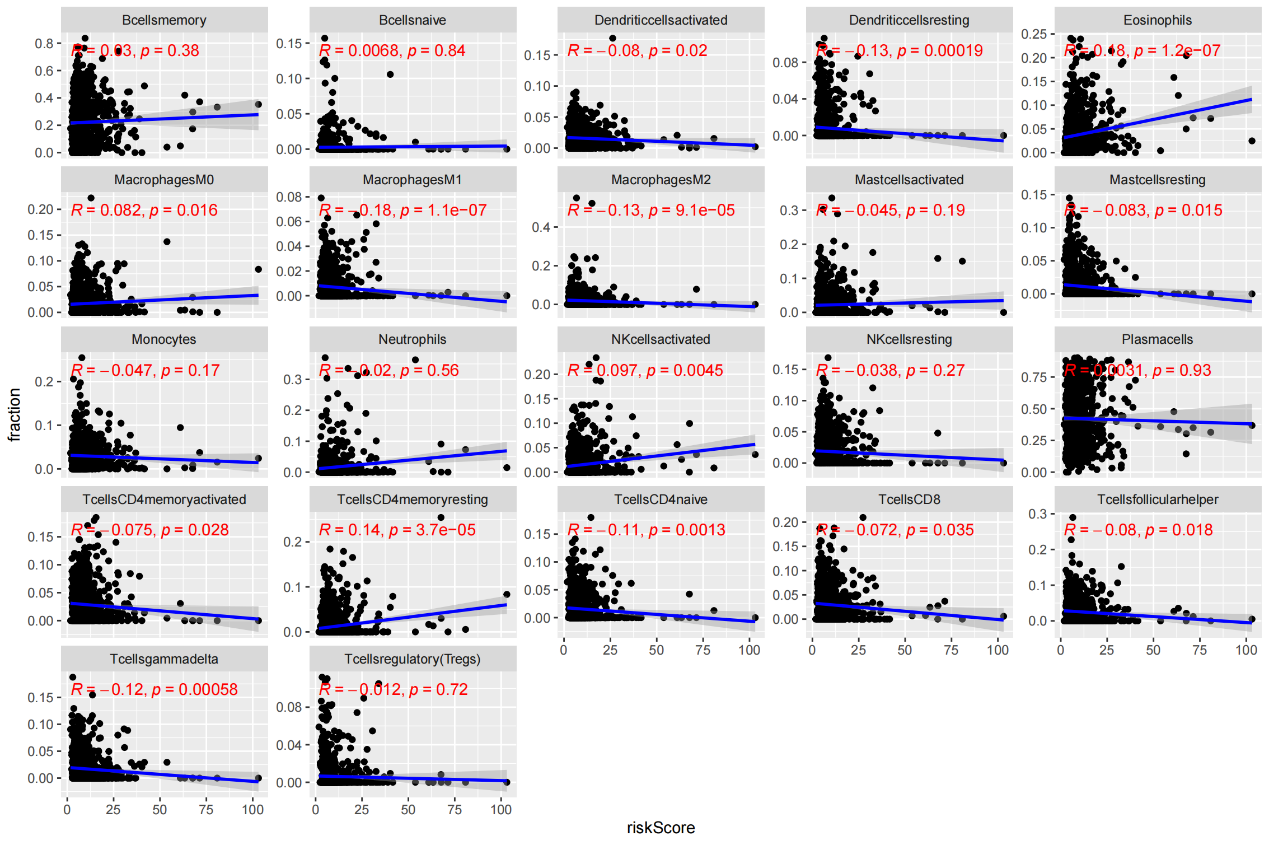


**Supplementary Figure S3.** Matrix of scatter plots showing the correlation between risk scores and immune cell infiltration levels.
